# Supplementary material
Source: Springer Nature journal article supplement (https://www.springermedizin.de/resource/supplementary/12913_2012_2756_MOESM2_ESM.pdf/9531346)
Supplement: MOESM2 [file 9531346]

Appendix B: Patients excluded from analysis

|                                                          | Patient 1                 | Patient 2                                | Patient 3*                      | Patient 4                       | Patient 5    | Patient 6    |
|----------------------------------------------------------|---------------------------|------------------------------------------|---------------------------------|---------------------------------|--------------|--------------|
| Discussion & Arm                                         |                           |                                          |                                 |                                 |              |              |
| Statin DA/Diabetes UC                                    | X                         |                                          | X                               |                                 |              |              |
| Statin UC/Diabetes DA                                    |                           | X                                        |                                 | X                               |              |              |
| Aspirin UC                                               |                           |                                          |                                 |                                 | X            | X            |
| Age ≤ 65                                                 | Yes                       | Yes                                      | Yes                             | Yes                             | Yes          | No           |
| Race                                                     | White                     | White                                    | Other                           | White                           | White        | White        |
| Education                                                | Some College              | Some College                             | Some College                    | Some College                    | Some College | 4 Yr College |
| Marital Status                                           | Married                   | Married                                  | Married                         | Married                         | Married      | Married      |
| Income                                                   | <40k                      | 40k+                                     | 40k+                            | 40k+                            | 40k+         | 40k+         |
| Years w/ diabetes                                        | 5+                        | 5+                                       | 5+                              | <5                              | <5           | 5+           |
| MI Risk                                                  | 24%                       | ~                                        | 9%                              | ~                               | 5.6%         | 23.6%        |
| HbA1c                                                    | 8.5                       | 8.3                                      | 7.6                             | 8.5                             | 6.1          | 6.2          |
| LDL                                                      | 58                        | 101                                      | 93                              |                                 | 142          | 87           |
| Blood Pressure                                           | 117/73                    | 127/75                                   | 124/82                          | 136-96                          | 116/66       | 110/62       |
| Outcomes:                                                |                           |                                          |                                 |                                 |              |              |
| Had a discussion about starting or changing a medication | Yes for Diabetes & Statin | Yes for Diabetes/ No response for Statin | Yes for Diabetes & Statin       | Yes for Diabetes/ No for statin | Yes          | No           |
| Start medication                                         | Yes for Diabetes & Statin | Yes                                      | Yes for Diabetes/ No for Statin | Yes                             | No           | ~            |
| Knowledge Diabetes at Baseline                           | 2/6                       | 6/6                                      | 2/6                             | 5/6                             | ~            | ~            |
| Knowledge of Risk w/out medication at Baseline           | Correct                   | ~                                        | Correct                         |                                 |              |              |
| Knowledge of risk w/ medication at baseline              | 15 or so                  | ~                                        | 8 or so                         |                                 |              |              |
| DCS                                                      | 100                       | 92.5                                     | 100                             | 100                             | 75           | ~            |
| Amount of Information                                    | Just right                | Missing                                  | Just right                      | Missing                         | Missing      | Missing      |
| Clarity of Information                                   | Somewhat                  | Missing                                  | Extremely                       | Missing                         | Missing      | Missing      |
| Helpfulness of Information                               | Extremely                 | Missing                                  | Extremely                       | Missing                         | Missing      | Missing      |
| Would want for other decisions                           | For Sure                  | Missing                                  | For Sure                        | Missing                         | Missing      | Missing      |
| Recommend to others                                      | Strongly for              | Missing                                  | Not Sure                        | Missing                         | Missing      | Missing      |

\* Post randomization exclusion
